# Supplementary material for: Hrip1 mediates rice cell wall fortification and phytoalexins elicitation to confer immunity against Magnaporthe oryzae
Source: Front Plant Sci. 2022 Sep 23;13:980821. doi: 10.3389/fpls.2022.980821 (PMC9546723; doi:10.3389/fpls.2022.980821)
Supplement: Supplementary file 2 [file Data_Sheet_2.xlsx]

## Sheet: Supplemental Table 1
Hrip1 mediates cell wall fortification and phytoalexins elicitation to confer immunity against Magnaporthe oryzae Vincent Ninkuu, Jianpei Yan, Lin Zhang, Zhenchao Fu, Tengfeng Yang, Shupeng Li, Beibei Li, Jiaqi Duan, Jie Ren, Guangyue Li, Xiufen Yang, Hongmei Zeng† State Key Laboratory for Biology of Plant Diseases and Insect Pests, Institute of Plant Protection, Chinese Academy of Agricultural S…
MSU	Gene ID	Symbol	Forward Primer		Reverse Primer
LOC_Os02g41670	Os02g0626600	OsPAL3	GGTCCCGCTCTCCTACAT		TGCTTCGGCTTCATCAAC
LOC_Os05g35290	Os05g0427400	OsPAL7	GAGATCAACTCCGTCAAC		TGTAGAAGTCGTTCACCA
LOC_Os02g41680	Os02g0627100	OsPAL4	GCTATCAACGAAGGCAAGCACAT		CCTGCCACTCGTACCAAGTTTTG
LOC_Os03g13210	Os03g0235000	OsPRX38	CTGGTGGCAAATCAGACGG		TGCGTTGAGACCGACATCC
LOC_Os07g48060	Os07g0677600	OsPRX115	CTTGAAGGAGCCGAGGATG		CAGAACGGAGCCATCACAA
LOC_Os04g01470	Os04g0104900	OsCOMTL2	CCTCAAGAAGTGCCACCAAG		GCAAACTCTGGTTCCGTCCT
Diterpenes
LOC_Os02g36210	Os02g0571100	OsCPS2	ACTGGTGGGGATACCGCAT			TGCTCAAGCCTGGCGTAGT
LOC_Os04g09900	Os04g0178300	OsCPS4	AGAATGAAGGACAAGTGGGC			CAGGACCTTCCCAATCCATAC
LOC_Os02g36140	Os02g0570400	OsKLS7	TTGGTAGGGAGCACATCAGG			CCATTGGCAAGGGTTAGC
LOC_Os12g30824	Os12g0491800	OsKLS10	TCTCACTGACAGCGGCAATA			CCACCCTCGCTAAACACCA
LOC_Os04g10010	Os04g0179200	OSSDR11C_MS3	TCTTCTCGCCACGGAGCATC			GGCGAAGTAGCCGACGATGT
LOC_Os07g46920	Os07g0664300		ACCGCTTCTCTTCCGTGTC			TCGGCGATGATGACTTTGG
Benzoxazinoids
LOC_Os03g58320		BX1	TGGTGAGGCAGTTGGGTGA			CTGAAGCCGCTGTGATTGC
LOC_Os01g36294		BX2	TCCTTCAAGAGCAGGGCATCA			GCCGCACTTCCATCATCAACA
LOC_Os03g50885	Os03g0718100	Osactin1	GAGTATGATGAGTCGGGTCCAG			ACACCAACAATCCCAAACAGAG

## Sheet: Supplemental Table 2
Supplementary Table 2: Summary of sequencing data for each sample
Sample	Raw Data Size (bp)	Raw Reads Number	Clean Data Size (bp)	Clean Reads Number	Clean Data Rate (%)
HT61	1197883500	23957670	1196837900	23936758	99.91
HT62	1197895600	23957912	1195560350	23911207	99.8
HT63	1197870850	23957417	1196870050	23937401	99.91
CB61	1197877400	23957548	1197084650	23941693	99.93
CB62	1197881850	23957637	1196802350	23936047	99.9
CB63	1197883500	23957670	1195870850	23917417	99.83
HT121	1197891750	23957835	1195183800	23903676	99.77
HT122	1197901800	23958036	1197502300	23950046	99.96
HT123	1197899050	23957981	1196717650	23934353	99.9
CB121	1197886800	23957736	1197267600	23945352	99.94
CB122	1197904200	23958084	1197376250	23947525	99.95
CB123	1197866850	23957337	1197176200	23943524	99.94
HT241	1197888300	23957766	1197108550	23942171	99.93
HT242	1197877250	23957545	1197417700	23948354	99.96
HT243	1197872750	23957455	1197337350	23946747	99.95
CB241	1197861050	23957221	1197479100	23949582	99.96
CB242	1197856450	23957129	1197318400	23946368	99.95
CB243	1197886950	23957739	1196914650	23938293	99.91
HT481	1197868700	23957374	1194156800	23883136	99.69
HT482	1197874550	23957491	1197020200	23940404	99.92
HT483	1197870650	23957413	1197294150	23945883	99.95
CB481	1197869200	23957384	1196950700	23939014	99.92
CB482	1197866750	23957335	1197150900	23943018	99.94
CB483	1197865850	23957317	1196891100	23937822	99.91
Average stats	1197874420	2.39575e+07	1.19699e+09	2.39398e+07	99.9213

## Sheet: Supplemental Table 3
S3: Statistics of Reads Mapped to Reference Genome
Sample	HT61	HT62	HT63	CB61	CB62	CB63	HT121	HT122	HT123	CB121	CB122	CB123
Total reads	23936758	23911207	23937401	23941693	23936047	23917417	23903676	23950046	23934353	23945352	23947525	23943524
Total mapped reads (%)	97.93	98.19	94.64	98.16	98.27	95.84	95.76	96.2	96.13	95.69	95.74	95.68
Unique match(%)	85.15	85.93	82.9	85.04	85.33	75.48	76.33	77.08	76.91	75.7	76.6	75.75
Multi-position match (%)	12.78	12.26	11.74	13.12	12.94	20.36	19.43	19.12	19.22	19.99	19.14	19.93
Total unmapped reads (%)	2.07	1.81	5.36	1.84	1.73	4.16	4.24	3.79	3.87	4.3	4.25	4.31
Sample	HT241	HT242	HT243	CB241	CB242	CB243	HT481	HT482	HT483	CB481	CB482	CB483
Total Reads	23942171	23948354	23946747	23949582	23946368	23938293	23883136	23940404	23945883	23939014	23943018	23937822
Total mapped reads (%)	95.24	95.34	95.43	95.53	95.28	95.46	95.67	95.25	94.95	93.34	94.07	94.03
Unique Match(%)	73.74	70.71	70.45	70.52	69.72	69.97	71.37	70.39	69.26	70.36	70.38	70.6
Multi-position match (%)	21.5	24.63	24.98	25.01	25.56	25.49	24.3	24.86	25.69	22.98	23.69	23.43
Total unmapped reads (%)	4.76	4.66	4.57	4.46	4.72	4.54	4.33	4.75	5.05	6.66	5.93	5.96
	Total Mapped Reads (%) = Unique Match (%) + Multi-position Match (%)

## Sheet: Supplemental Table 4
S4: Statistics of Reads Mapped to Reference Gene
Sample	HT61	HT62	HT63	CB61	CB62	CB63	HT121	HT122	HT123	CB121	CB122	CB123
Total Reads	23936758	23911207	23937401	23941693	23936047	23917417	23903676	23950046	23934353	23945352	23947525	23943524
Total Mapped Reads (%)	90.14	90.64	87.11	91.13	91.61	88.43	87.45	87.81	87.12	88.5	86.76	87.68
Unique Match(%)	78.98	79.26	75.99	79.47	79.02	77.65	78.25	78.09	77.87	79.34	77.88	78.8
Multi-position Match (%)	11.16	11.38	11.12	11.66	12.58	10.79	9.19	9.72	9.25	9.16	8.88	8.88
Total Unmapped (%)	9.86	9.36	12.89	8.87	8.39	11.57	12.55	12.19	12.88	11.5	13.24	12.32
	HT241	HT242	HT243	CB241	CB242	CB243	HT481	HT482	HT483	CB481	CB482	CB483
	23942171	23948354	23946747	23949582	23946368	23938293	23883136	23940404	23945883	23939014	23943018	23937822
	87.28	87.47	87.77	87.91	88.41	87.86	87.98	88.08	87.51	86.07	87.06	86.85
	77.69	77.94	78.96	78.82	78.14	78.14	79.1	78.27	79.04	77.33	78.45	78.15
	9.6	9.53	8.82	9.09	10.27	9.72	8.88	9.81	8.47	8.74	8.61	8.7
	12.72	12.53	12.23	12.09	11.59	12.14	12.02	11.92	12.49	13.93	12.94	13.15
Total Mapped Reads (%) = Unique Match (%) + Multi-position Match (%).

## Sheet: Supplemental Table 5
S5: Quality control test
Sample	Clean Read Q20(%) ≥ 90		Clean Reads ≥ 20 (M)		Gene Unique Mapping Ratio(%) ≥ 80		Genome Mapping Ratio(%) ≥ 50
CB061	97.6	Yes	23.94	Yes	87.21	Yes	98.16	Yes
CB062	97.7	Yes	23.94	Yes	86.26	Yes	98.27	Yes
CB063	95.2	Yes	23.92	Yes	87.81	Yes	95.84	Yes
HT061	97.5	Yes	23.94	Yes	87.62	Yes	97.93	Yes
HT062	97.9	Yes	23.91	Yes	87.44	Yes	98.19	Yes
HT063	97.9	Yes	23.94	Yes	87.23	Yes	94.64	Yes
CB121	95.1	Yes	23.95	Yes	89.65	Yes	95.69	Yes
CB122	95.4	Yes	23.95	Yes	89.76	Yes	95.74	Yes
CB123	95.1	Yes	23.94	Yes	89.87	Yes	95.68	Yes
HT121	95.4	Yes	23.9	Yes	89.48	Yes	95.76	Yes
HT122	95.7	Yes	23.95	Yes	88.93	Yes	96.2	Yes
HT123	95.6	Yes	23.93	Yes	89.38	Yes	96.13	Yes
CB241	92.6	Yes	23.95	Yes	89.66	Yes	95.53	Yes
CB242	92.3	Yes	23.95	Yes	88.38	Yes	95.28	Yes
CB243	92.2	Yes	23.94	Yes	88.94	Yes	95.46	Yes
HT241	94.6	Yes	23.94	Yes	89.01	Yes	95.24	Yes
HT242	92.6	Yes	23.95	Yes	89.1	Yes	95.34	Yes
HT243	92.5	Yes	23.95	Yes	89.96	Yes	95.43	Yes
CB481	93.2	Yes	23.94	Yes	89.85	Yes	93.34	Yes
CB482	92.8	Yes	23.94	Yes	90.11	Yes	94.07	Yes
CB483	92.8	Yes	23.94	Yes	89.98	Yes	94.03	Yes
HT481	92.8	Yes	23.88	Yes	89.91	Yes	95.67	Yes
HT482	92.5	Yes	23.94	Yes	88.86	Yes	95.25	Yes
HT483	91.9	Yes	23.95	Yes	90.32	Yes	94.95	Yes
					89.2114		95.5024

## Sheet: Supplemental Table 6
	Gene ID	Locus	Symbol	Aceesion	Description
	LOC_Os05g35290	Os05g0427400	OsPAL7	CI551987	Phenylalanine ammonia-lyase, putative, expressed
	LOC_Os04g43800	Os04g0518400	OsPAL6	AK067801	Similar to Phenylalanine ammonia-lyase (EC 4.3.1.5).
	LOC_Os02g41680	Os02g0627100	OsPAL4	D21290	Similar to Phenylalanine ammonia-lyase (EC 4.3.1.5).
	LOC_Os02g41670	Os02g0626600	OsPAL3	CI198223	Phenylalanine ammonia-lyase family protein.
	LOC_Os02g26810	Os02g0467600		AK072588	Similar to Cinnamate 4-hydroxylase CYP73.
	LOC_Os05g25640	Os05g0320700	OsC4H2	AK104994	Cinnamate 4-hydroxylase 2, C4H-like gene
	LOC_Os04g57850	Os04g0674700	OsSLAC1	AK106615	Cinnamate 4-hydroxylase 2, C4H-like gene
	LOC_Os08g34790	Os08g0448000	Os4CL5	AK120964	4-coumarate--CoA ligase / 4-coumaryl-CoA synthetase
	LOC_Os09g38350	Os09g0555800		CI218546	Similar to AMP-binding protein
	LOC_Os04g58710	Os04g0683700		AK119512	Similar to 4-coumarate-CoA ligase-like protein
	LOC_Os02g08420	Os02g0180700	OsCCR21	AK070746	Similar to Cinnamoyl-CoA reductase (EC 1.2.1.44).
	LOC_Os09g04050	Os09g0127300	OsCCR17	AK100234	NAD-dependent epimerase/dehydratase family protein.
	LOC_Os08g34280	Os08g0441500	OsCCR20	AK072872	Similar to Cinnamoyl-CoA reductase.
	LOC_Os07g41060	Os07g0601900		AK105572	Similar to NADPH HC toxin reductase (Fragment).
Monolignol	LOC_Os04g15920	Os04g0229100	OsCAD6	AK099270	Similar to Sinapyl alcohol dehydrogenase.
Biosynthetic	LOC_Os02g09490	Os02g0187800	OsCAD2	AK105011	Cinnamyl alcohol dehydrogenase (EC 1.1.1.195).
Gene	LOC_Os09g38350	Os09g0555800		CI218546	Similar to AMP-binding protein (Adenosine monophosphate binding protein 6 AMPBP6)
	LOC_Os04g58710	Os04g0683700	OsAAE3	AK119512	Similar to 4-coumarate-CoA ligase-like protein
	LOC_Os08g44840	Os08g0562500		AK063515	Transferase family protein.
	LOC_Os10g23310	Os10g0379100		CI427897	Transferase family protein.
	LOC_Os04g56900	Os04g0664500	OsAHT1	AK109743	Similar to Agmatine coumaroyltransferase.
	LOC_Os08g02030	Os08g0112300		AK070381	Transferase family protein.
	LOC_Os11g42370	Os11g0643100	OsTBT2	AK061327	Transferase family protein.
	LOC_Os04g56910	Os04g0664600			Similar to Agmatine coumaroyltransferase.
	LOC_Os08g07730	Os08g0174300			Transferase family protein.
	LOC_Os02g39850	Os02g0611800	OsHCT2	AK104319	Similar to Hydroxyanthranilate hydroxycinnamoyltransferase 3.
	LOC_Os10g23820	Os10g0380100	OsTHT2	AK066965	Transferase family protein.
	LOC_Os11g42290	Os11g0642400	OsTBT1	CI434548	Transferase family protein.
	LOC_Os09g37200	Os09g0544000	OsPHT4		Transferase family protein.
	LOC_Os12g13800	Os12g0240900	OsNOMT		Similar to Caffeic acid 3-O-methyltransferase
	LOC_Os12g13810	Os12g0240900	OsCOMTL3		Similar to Caffeic acid 3-O-methyltransferase
	LOC_Os04g01470	Os04g0104900	OsCOMTL2	AK069960	Similar to 0-methyltransferase (EC 2.1.1.6) (Fragment).
	LOC_Os08g06100	Os08g0157500	OsCOMT1	AK064768	Similar to Caffeic acid 3-O-methyltransferase (EC 2.1.1.68)
	LOC_Os01g21310	Os01g0315600		AK110785	Caffeoylshikimate esterase
	LOC_Os10g36848	Os10g0512400	OsF5H1	AK067847	Cytochrome P450 family protein.
	LOC_Os03g13200	Os03g0234900		AK104936	Similar to Peroxidase (EC 1.11.1.7).
	LOC_Os05g04500	Os05g0135500	OsPRX71	AK120246	Haem peroxidase family protein.
	LOC_Os10g02040	Os10g0109300	OsPRX125	AK061462	Similar to Peroxidase (EC 1.11.1.7).
	LOC_Os05g04380	Os05g0134400	OsPRX65	AK061809	Haem peroxidase, plant/fungal/bacterial family protein.
	LOC_Os07g48040	Os07g0677400	OsPRX113	AF014469	Peroxidase.
	LOC_Os01g22249	Os01g0326100	OSPRX13	AK062793	Similar to Peroxidase component PR-2 and/or 4 (Fragment).
	LOC_Os07g48020	Os07g0677200	OsPRX111	AK073202	Peroxidase.
	LOC_Os07g48060	Os07g0677600	OsPRX15	AK060984	Similar to Cationic peroxidase.
	LOC_Os07g48050	Os07g0677500	OsPRX14	AF247700	Similar to Peroxidase precursor (EC 1.11.1.7).
	LOC_Os04g59200	Os04g0688500	OsPRX62	AK067667	Peroxidase (EC 1.11.1.7).
Monolignol	LOC_Os10g02070	Os10g0109300	OsPRX126		Peroxidase (EC 1.11.1.7).
Polymerization	LOC_Os12g02060	Os12g0111800		CI552210	peroxidase precursor, putative.
Genes	LOC_Os02g14430	Os02g0240100	OsPRX30	AK108037	Similar to Peroxidase 2 (Fragment).
	LOC_Os01g73200	Os01g0963000	OsPRX22	AK061131	Similar to Peroxidase BP 1 precursor.
	LOC_Os04g32030	Os04g0390100		CI376671	Heavy metal transport/detoxification protein domain containing protein.
	LOC_Os08g02110		OsPRX117		Peroxidase precursor, putative, expressed.
	LOC_Os04g59190	Os04g0688300	OsPRX61	AK104928	Haem peroxidase, plant/fungal/bacterial family protein.
	LOC_Os12g34524	Os12g0530100	OsPRX138	AK109551	Similar to Peroxidase 24 precursor (EC 1.11.1.7) (Atperox P24) (ATP47).
	LOC_Os03g22010	Os03g0339300	OsPRX41	AK104395	Similar to Peroxidase (EC 1.11.1.7).
	LOC_Os01g15830	Os01g0263300	OsPRX3	AK061583	Similar to Peroxidase 72 precursor (EC 1.11.1.7) (Atperox P72) (PRXR8) (ATP6a).
	LOC_Os03g13210	Os03g0235000	OsPRX38	AK103019	Peroxidase (EC 1.11.1.7).
	LOC_Os07g48010	Os07g0677100	OsPRX110	AF014468	Peroxidase (EC 1.11.1.7).
	LOC_Os02g58720	Os02g0833900		AK106171	Similar to Peroxidase 64 precursor (EC 1.11.1.7) (Atperox P64) (PRXR4) (ATP17a).
	LOC_Os06g35520	Os06g0547400	OsPRX86	AK121950	Similar to Peroxidase P7 (EC 1.11.1.7) (TP7).
	LOC_Os11g10460	Os11g0210100	OsPRX132	CI256034	Plant peroxidase family protein.
	LOC_Os05g41990	Os05g0499300	OsPRX74	D14997	Similar to Peroxidase (EC 1.11.1.7).
	LOC_Os02g33450	Os02g0537700	OsPRX2	AK104703	Similar to 2-cys peroxiredoxin BAS1, chloroplast precursor (Fragment).
	LOC_Os04g59150	Os04g0688100	OsPRX59	AF019743	Peroxidase (EC 1.11.1.7).
	LOC_Os07g48050	Os07g0677500	OsPRX114	AF247700	Similar to Peroxidase precursor (EC 1.11.1.7).
	LOC_Os07g48060	Os07g0677600	OsPRX115	AK060984	Similar to Cationic peroxidase.
	LOC_Os06g16350		OsPRX77		Peroxidase precursor, putative, expressed
	LOC_Os07g01370	Os07g0104100	OsPRX97	AK107894	Similar to Peroxidase 27 precursor (EC 1.11.1.7)
	LOC_Os09g32964	Os09g0507500	OsPRX73	AK071392	Similar to Peroxidase 55 precursor (EC 1.11.1.7)
